# Supplementary material for: Risk Assessment of Dissolved Trace Elements and Heavy Metals in the Upper Reaches of the Yangtze River, China
Source: MDPI journal article supplement (doi:10.3390/w15071330), 2023-03-28
Supplement: s1 [file s1]

## Supplementary Materials

**Table S1.** Relative weight of chemical parameters.

| Parameters       | Weight (wi) | Relative Weight (Wi) |
|------------------|-------------|----------------------|
| Na(mg/L)         | 2           | 0.068965517          |
| Mg(mg/L)         | 2           | 0.068965517          |
| Ba(mg/L)         | 2           | 0.068965517          |
| Co(ug/L)         | 1           | 0.034482759          |
| Cu(mg/L)         | 2           | 0.068965517          |
| Fe(mg/L)         | 4           | 0.137931034          |
| Mn(mg/L)         | 5           | 0.172413793          |
| Ca(mg/L)         | 2           | 0.068965517          |
| Hg (ug/L)        | 5           | 0.172413793          |
| PH               | 4           | 0.137931034          |
| $\Sigma wi = 29$ |             | $\Sigma Wi = 1$      |

**Table S2.** The parameter values.

| RfDingestion<br>(ug/kg/day) |     | RfDdermal<br>(ug/kg/day) | K <sub>p</sub>     | ABS <sub>GI</sub> |
|-----------------------------|-----|--------------------------|--------------------|-------------------|
| Na                          |     |                          | $1 \times 10^{-3}$ |                   |
| Mg                          |     |                          | $1 \times 10^{-3}$ |                   |
| Li                          | 20  | 10                       | $1 \times 10^{-3}$ | 0.001             |
| Sr                          | 600 | 120                      | $1 \times 10^{-3}$ | 0.001             |
| Ba                          | 70  | 14                       | $1 \times 10^{-3}$ | 0.001             |
| Co                          | 0.3 | 0.06                     | $4 \times 10^{-4}$ | 0.001             |
| Cu                          | 40  | 12                       | $1 \times 10^{-3}$ | 0.001             |
| Fe                          | 300 | 45                       | $1 \times 10^{-3}$ | 0.001             |
| Mn                          | 20  | 0.8                      | $1 \times 10^{-3}$ | 0.001             |
| Sc                          |     |                          | $1 \times 10^{-3}$ |                   |
| Ca                          |     |                          | $1 \times 10^{-3}$ |                   |
| Hg                          | 0.3 | 0.021                    | $1 \times 10^{-3}$ | 0.001             |

**Table S3.** The total hardness (TH) analysis of the Yangtze River samples.

| Station          | Mg (mg/L) |      | Ca (mg/L) |      | TH (mg/L) | Average Value |
|------------------|-----------|------|-----------|------|-----------|---------------|
|                  | Mean      | SD   | Mean      | SD   |           |               |
| XJ (Minjiang)    | 11.48     | 0.05 | 41.13     | 0.20 | 149.89    | 181.65        |
| DC (Daninghe)    | 8.94      | 0.29 | 45.84     | 0.13 | 151.25    |               |
| GY (Xiaojiang)   | 9.66      | 0.94 | 48.54     | 0.50 | 160.93    |               |
| TPX (Taipingxi)  | 10.29     | 0.08 | 48.37     | 0.84 | 163.11    |               |
| HJ (Hejiang)     | 13.67     | 0.80 | 43.28     | 0.08 | 164.26    |               |
| CS (Chishuihe)   | 8.78      | 0.17 | 51.77     | 0.75 | 165.44    |               |
| XK (Xiangxihe)   | 11.09     | 0.03 | 49.15     | 0.30 | 168.36    |               |
| WS (Wushan)      | 10.68     | 0.16 | 51.40     | 0.62 | 172.31    |               |
| YC (Yichang)     | 10.99     | 0.10 | 51.15     | 0.41 | 172.93    |               |
| JA (Jiangan)     | 13.32     | 0.22 | 48.04     | 0.20 | 174.71    |               |
| FD (Fengdu)      | 14.12     | 0.26 | 49.19     | 0.38 | 180.88    |               |
| WL (Wujiang)     | 10.60     | 0.19 | 55.26     | 0.11 | 181.61    |               |
| XZ (Jinshajiang) | 17.65     | 0.19 | 43.92     | 0.60 | 182.16    |               |
| YY (Yunyang)     | 15.12     | 0.54 | 49.01     | 0.21 | 184.53    |               |

|                   |       |      |       |      |        |
|-------------------|-------|------|-------|------|--------|
| BN (Banan)        | 13.34 | 0.22 | 58.29 | 0.91 | 200.44 |
| MD (Mudong)       | 12.80 | 0.22 | 60.64 | 0.32 | 204.10 |
| HC (Jialingjiang) | 16.82 | 0.21 | 54.08 | 0.15 | 204.16 |
| BN (Jantanhe)     | 11.02 | 0.18 | 70.22 | 0.69 | 220.76 |
| HS (Tuojiang)     | 17.47 | 0.05 | 71.17 | 0.21 | 249.55 |

Table S4. The WQI value for each sampling location.

| Station/Parameters | Ba     | Co     | Cu     | Fe     | Mn     | Hg     | Na     | Mg     | Ca     | Ph     | WQI     |
|--------------------|--------|--------|--------|--------|--------|--------|--------|--------|--------|--------|---------|
| JA                 | 0.0035 | 0.0006 | 0.0002 | 0.0268 | 0.0150 | 0.0018 | 0.0021 | 0.0306 | 0.0442 | 0.0000 | 12.4867 |
| HJ                 | 0.0031 | 0.0007 | 0.0001 | 0.0209 | 0.0031 | 0.0013 | 0.0017 | 0.0314 | 0.0398 |        | 10.2182 |
| BN                 | 0.0029 | 0.0008 | 0.0002 | 0.0562 | 0.0554 | 0.0010 | 0.0017 | 0.0307 | 0.0536 |        | 20.2556 |
| MD                 | 0.0038 | 0.0010 | 0.0002 | 0.0203 | 0.0317 | 0.0015 | 0.0014 | 0.0294 | 0.0558 |        | 14.5152 |
| FD                 | 0.0040 | 0.0012 | 0.0002 | 0.0206 | 0.0018 | 0.0010 | 0.0016 | 0.0325 | 0.0453 |        | 10.8095 |
| YY                 | 0.0038 | 0.0017 | 0.0003 | 0.0245 | 0.0029 | 0.0011 | 0.0018 | 0.0348 | 0.0451 |        | 11.6037 |
| WS                 | 0.0041 | 0.0005 | 0.0002 | 0.0187 | 0.0000 | 0.0033 | 0.0012 | 0.0246 | 0.0473 |        | 9.9877  |
| TPX                | 0.0039 | 0.0009 | 0.0002 | 0.0189 | 0.0000 | 0.0027 | 0.0012 | 0.0237 | 0.0445 |        | 9.5946  |
| YC                 | 0.0042 | 0.0018 | 0.0003 | 0.0218 | 0.0000 | 0.0030 | 0.0013 | 0.0253 | 0.0471 |        | 10.4748 |
| XZ (Jinshajiang)   | 0.0034 | 0.0006 | 0.0002 | 0.0177 | 0.0000 | 0.0011 | 0.0023 | 0.0406 | 0.0404 |        | 10.6376 |
| XJ (Minjiang)      | 0.0030 | 0.0006 | 0.0002 | 0.0233 | 0.0063 | 0.0016 | 0.0013 | 0.0264 | 0.0378 |        | 10.0523 |
| HS (Tuojiang)      | 0.0064 | 0.0007 | 0.0002 | 0.0198 | 0.0215 | 0.0028 | 0.0026 | 0.0402 | 0.0655 |        | 15.9605 |
| CS (Chishuihe)     | 0.0036 | 0.0007 | 0.0002 | 0.0305 | 0.0087 | 0.0012 | 0.0010 | 0.0202 | 0.0476 |        | 11.3818 |
| BN (Jiantanhe)     | 0.0029 | 0.0008 | 0.0002 | 0.0562 | 0.0554 | 0.0010 | 0.0017 | 0.0307 | 0.0536 |        | 20.2556 |
| HC (Jialingjiang)  | 0.0052 | 0.0006 | 0.0002 | 0.0260 | 0.0061 | 0.0000 | 0.0014 | 0.0387 | 0.0498 |        | 12.7923 |
| WL (Wujiang)       | 0.0027 | 0.0011 | 0.0001 | 0.0187 | 0.0000 | 0.0022 | 0.0009 | 0.0244 | 0.0508 |        | 10.0849 |
| GY (Xiaojiang)     | 0.0055 | 0.0013 | 0.0003 | 0.0306 | 0.0000 | 0.0019 | 0.0017 | 0.0222 | 0.0447 | 0.1500 | 25.8230 |
| DC (Daninghe)      | 0.0035 | 0.0023 | 0.0003 | 0.0218 | 0.0005 | 0.0191 | 0.0015 | 0.0206 | 0.0422 | 0.1409 | 25.2681 |
| XK (Xiangxihe)     | 0.0046 | 0.0006 | 0.0002 | 0.0224 | 0.0000 | 0.0074 | 0.0013 | 0.0255 | 0.0452 |        | 10.7267 |
